# Supplementary material for: Perspectives of health workers on the referral of women with obstetric complications: a qualitative study in rural Sierra Leone
Source: PubMed Central journal article supplement (PMC7733167; doi:10.1136/bmjopen-2020-041746), 2020-12-10
Supplement: bmjopen-2020-041746supp002.pdf [file bmjopen-2020-041746supp002.pdf]

**SUPPLEMENTARY FILE 2****Signal functions of BEmONC and CEmONC**

## Basic Emergency Obstetric and Neonatal Care (BEmONC)

1. Parenteral treatment of infections (antibiotics)
2. Parenteral treatment of severe pre-eclampsia/eclampsia (e.g., MgSO<sub>4</sub>)
3. Treatment of PPH (e.g., uterotonics)
4. Manual vacuum aspiration of retained products of conception
5. Assisted vaginal delivery (e.g., vacuum-assisted delivery)
6. Manual removal of placenta
7. New-born resuscitation

## Comprehensive Emergency Obstetric and Neonatal Care (CEmONC)

All components of BEmONC, plus

1. Surgical capability, including anaesthesia (e.g., Caesarean Section)
2. Blood transfusion
